# Supplementary material
Source: PubMed Central journal article supplement (PMC2563800)
Supplement: NIHMS64822-supplement-1_s.pdf [file NIHMS64822-supplement-1_s.pdf]

**Supporting Information**

**Conformationally Constrained Analogues of DAG. 25. Exploration of the *sn*-1 and *sn*-2 carbonyl functionality reveals the essential role of the *sn*-1 carbonyl at the lipid interface in the binding of DAG-lactones to protein kinase C**

*Ji-Hye Kang,<sup>1</sup> Megan L. Peach,<sup>2</sup> Yongmei Pu,<sup>3</sup> Nancy E. Lewin,<sup>3</sup> Peter M. Blumberg,<sup>3</sup>  
and Victor E. Marquez<sup>1\*</sup>*

<sup>1</sup>Laboratory of Medicinal Chemistry, Center for Cancer Research, National Cancer Institute-Frederick, National Institutes of Health, Frederick, MD 21702; <sup>2</sup>Basic Research Program, SAIC-Frederick, Inc., NCI-Frederick, Frederick, MD 21702 and

<sup>3</sup>Laboratory of Cellular Carcinogenesis & Tumor Promotion, Center for Cancer Research, National Cancer Institute, National Institutes of Health, Bethesda, MD 20892.

\* Author to whom correspondence should be addressed. Laboratory of Medicinal Chemistry, Center for Cancer Research, National Cancer Institute-Frederick, National Institutes of Health, Frederick, MD 21702 Tel: 301-846-5954. Fax: 301-846-6033.  
Email: marquezv@mail.nih.gov

**4-(2-Iodoethyl)-2,6-dimethylheptane (15).**

Anal calcd for C<sub>11</sub>H<sub>23</sub>I: C, 46.82; H, 8.21; I, 44.97. Found: 47.08; H, 8.17; I, 44.71.

**(E/Z)-4-Methoxy-1-((4-[5-methyl-3-(2-methylpropyl)hexylidene]-2-  
[(phenylmethoxy)methyl](2-2,3,5-trihydrofuryl))methoxy)benzene (18).**

Anal calcd for C<sub>31</sub>H<sub>44</sub>O<sub>4</sub> • 0.6H<sub>2</sub>O: C, 75.75; H, 9.26. Found: C, 75.62; H, 9.02.

**(E/Z)-{4-[5-Methyl-3-(2-methylpropyl)hexylidene]-2-[(phenylmethoxy)methyl]-2-  
2,3,5-trihydrofuryl}methan-1-ol (19).**

Anal. calcd for C<sub>24</sub>H<sub>38</sub>O<sub>3</sub> • 0.1H<sub>2</sub>O: C, 76.59; H, 10.23. Found: C, 76.37; H, 10.31.

**(E/Z)-{2-(Hydroxymethyl)-4-[5-methyl-3-(2-methylpropyl)hexylidene]-2-2,3,5-  
trihydrofuryl}methyl 2,2-Dimethylpropanoate (8).**

Anal calcd for C<sub>22</sub>H<sub>42</sub>O<sub>5</sub> • 0.5H<sub>2</sub>O: C, 69.98; H, 10.94. Found: C, 69.97; H, 10.50.

**(Z)-5-(Hydroxymethyl)-5-[(4-methoxyphenoxy)methyl]-3-[5-methyl-3-(2-  
methylpropyl)hexylidene]-4,5-dihydrofuran-2-one (24).**

Anal. calcd for C<sub>24</sub>H<sub>36</sub>O<sub>5</sub>: C, 71.26; H, 8.97. Found: C, 70.98; H, 9.04.

**(Z)-{2-[(4-Methoxyphenoxy)methyl]-4-[5-methyl-3-(2-methylpropyl)hexylidene]-5-  
oxo-2-2,3-dihydrofuryl}methyl Methylsulfonate (26).**

Anal. calcd for C<sub>25</sub>H<sub>36</sub>O<sub>7</sub>S: C, 62.21; H, 7.94. Found: C, 61.97; H, 7.83.

**(Z)-{2-(Hydroxymethyl)-4-[5-methyl-3-(2-methylpropyl)hexylidene-5-oxo-2-2,3-dihydrofuryl]methyl Methylsulfonate (28).**

Anal. calcd for  $C_{18}H_{32}O_6S$ : C, 57.42; H, 8.57. Found: C, 57.63; H, 8.66.

**(Z)-5-[(2,2-Dimethylpropoxy)methyl]-5-(hydroxymethyl)-3-[5-methyl-3-(2-methylpropyl)hexylidene]-4,5-dihydrofuran-2-one (10).**

Anal. calcd for  $C_{22}H_{40}O_4 \cdot 0.8H_2O$ : C, 69.00; H, 10.95. Found: C, 68.82; H, 10.28.

**(E)-5-(Hydroxymethyl)-5-[(4-methoxyphenoxy)methyl]-3-[5-methyl-3-(2-methylpropyl)hexylidene]-4,5-dihydrofuran-2-one (23)**

Anal calcd for  $C_{24}H_{36}O_5 \cdot 0.2H_2O$ : C, 70.62; H, 8.98. Found: C, 70.31; H, 9.03.

**(E)-{2-[(4-Methoxyphenoxy)methyl]-4-[5-methyl-3-(2-methylpropyl)hexylidene]-5-oxo-2-2,3-dihydrofuryl]methyl Methylsulfonate (25).**

Anal. calcd for  $C_{25}H_{36}O_7S$ : C, 62.21; H, 7.94. Found: C, 62.38; H, 7.77.

**(E)-{2-(Hydroxymethyl)-4-[5-methyl-3-(2-methylpropyl)hexylidene-5-oxo-2-2,3-dihydrofuryl]methyl methylsulfonate (27).**

Anal calcd for  $C_{18}H_{32}O_6S$ : C, 57.42; H, 8.57. Found: C, 57.23; H, 8.67.

**(E)-5-[(2,2-Dimethylpropoxy)methyl]-5-(hydroxymethyl)-3-[5-methyl-3-(2-methylpropyl)hexylidene]-4,5-dihydrofuran-2-one (9).**

Anal. calcd for  $C_{22}H_{40}O_4$ : C, 71.70; H, 10.94. Found: C, 71.38; H, 10.93

**5-(Hydroxymethyl)-5-[(phenylmethoxy)methyl]-3,4,5-trihydrofuran-2-one (30).**

Anal. Calcd for  $C_{13}H_{16}O_4$ : C, 66.09; H, 6.83. Found: C, 66.37; H, 6.84.

**(E)-5,5-bis[Phenylmethoxy)methyl]-3-[5-methyl-3-(2-methylpropyl)hexylidene]-4,5-dihydrofuran-2-one (32).**

Anal. calcd for  $C_{31}H_{42}O_4 \cdot 0.4H_2O$ : C, 76.63; H, 8.87. Found: C, 76.30; H, 8.81.

**(Z)-5,5-bis[Phenylmethoxy)methyl]-3-[5-methyl-3-(2-methylpropyl)hexylidene]-4,5-dihydrofuran-2-one (33).**

Anal. calcd for  $C_{31}H_{42}O_4 \cdot 0.2H_2O$ : C, 76.63; H, 8.87. Found: C, 76.39; H, 8.81.

**(E)-5,5-bis[(Phenylmethoxy)methyl]-3-[5-methyl-3-(2-methylpropyl)hexylidene]-4,5-dihydrofuran-2-thione (34).**

Anal calcd for  $C_{31}H_{42}O_3S \cdot 1.1H_2O$ : C, 72.36; H, 8.65. Found: C, 72.55; H, 8.27.

**(E)-{2-(Hydroxymethyl)-4-[5-methyl-3-(2-methylpropyl)hexylidene]-5-thioxo-2,2,3-dihydrofuryl)methyl 2,2-Dimethylpropanoate (11).**

Anal. calcd for  $C_{22}H_{38}O_4S \cdot 0.33H_2O$ : C, 65.31; H, 9.63. Found: C, 65.20; H, 9.34.

**(E)-5-[(2,2-Dimethyl-1-thioxopropoxy)methyl]-5-(hydroxymethyl)-3-[5-methyl-3-(2-methylpropyl)hexylidene]-4,5-dihydrofuran-2-one (12).**

Anal. Calcd for  $C_{22}H_{38}O_4S$ : C, 66.29; H, 9.61. Found: C, 65.82; H, 9.57.
